# Supplementary material for: A lignin-based nano-adsorbent for superfast and highly selective removal of phosphate
Source: Royal Society of Chemistry journal article supplement (doi:10.1039/c8ta01449c), 2018-01-01
Supplement: c8ta01449c1.pdf [file c8ta01449c1.pdf]

## Lignin-based nano-adsorbent for superfast and highly selective removal of phosphate

Enmin Zong<sup>a</sup>, Guobo Huang<sup>a,#</sup>, Xiaohuan Liu<sup>b,\*</sup>, Weiwei Lei<sup>c,\*</sup>, Shengtao Jiang<sup>a</sup>,  
**Zhongqin** Ma<sup>b</sup>, Jifu Wang<sup>d</sup>, Pingan Song<sup>b,e,\*</sup>

<sup>a</sup>*Zhejiang Provincial Key Laboratory of Plant Evolutionary Ecology and Conservation, Taizhou University, 1139 Shifu Street, Taizhou 318000, PR China*

<sup>b</sup>*School of Engineering, Zhejiang A & F University, 666 Wusu Street, Hangzhou 311300, PR China*

<sup>c</sup>*Institute of Frontier Materials, Deakin University, Locked Bag 20000, Geelong, VIC 3220, Australia*

<sup>d</sup>*Jiangsu Key Lab. of Biomass Energy and Material, Institute of Chemical Industry of Forest Products, CAF, Nanjing 210042, PR China*

<sup>e</sup>*Center for Future Materials, University of Southern Queensland, Toowoomba, 4350, Australia*

\*Corresponding authors should be addressed at: liuxiaohuancaf@163.com (X.H. Liu), weiwei.lei@deakin.edu.au (W.W. Lei) and pingansong@gmail.com (P.A. Song)

# Enmin Zong and Guobo Huang equally contribute to this work as the co-first author.

The main equations used in this study are as follows:

$$\log(q_e - q_t) = \log q_e - \frac{k_1 t}{2.303} \quad (1)$$

$$\frac{t}{q_t} = \frac{1}{k_2 q_e^2} + \frac{t}{q_e} \quad (2)$$

Where  $q_t$  (mg g<sup>-1</sup>) and  $q_e$  are the adsorbed capacities (mg g<sup>-1</sup>) at time  $t$  (min) and equilibrium, respectively, respectively;  $k_1$  (min<sup>-1</sup>) and  $k_2$  (g mg<sup>-1</sup> min<sup>-1</sup>) are the related reaction rate constants.

$$q_t = k_{dr} \sqrt{t} + C \quad (3)$$

Where  $k_i$  (mg P g<sup>-1</sup> min<sup>-1/2</sup>) is the diffusion rate constant whereas the  $C$  is the intercept for the intraparticle diffusion model. Values of  $k_i$  and  $C$  are calculated from the slope of the linear plot of  $q_t$  against  $t^{1/2}$ .

$$\frac{1}{q_e} = \frac{1}{q_m b C_e} + \frac{1}{q_m} \quad (4)$$

$$\ln q_e = \ln K_f + \frac{1}{n} \ln C_e \quad (5)$$

Where  $q_e$  and  $q_m$  represent the amount of adsorbing phosphate per unit weight of adsorbent at equilibrium and the maximum adsorption capacity (mg g<sup>-1</sup>), respectively.  $C_e$  (mg L<sup>-1</sup>),  $b$  (L mg<sup>-1</sup>),  $K_f$ , and  $1/n$  respectively refer to the equilibrium solution concentration, the Langmuir model constant, a rough indicator of adsorption capacity, and the heterogeneity factor.

$$R_L = \frac{1}{1 + bC_0} \quad (6)$$

Where  $C_0$  is the highest initial phosphate concentration ( $\text{mg L}^{-1}$ ), and the value of  $R_L$  can indicate whether the adsorption is irreversible ( $R_L = 0$ ), favorable ( $0 < R_L < 1$ ), linear ( $R_L = 1$ ), or unfavorable ( $R_L > 1$ ).

$$\Delta G^0 = -RT \ln K_d \quad (7)$$

$$\Delta G^0 = \Delta H^0 - T\Delta S^0 \quad (8)$$

$$\ln K_d = \frac{\Delta S^0}{R} - \frac{\Delta H^0}{RT} \quad (9)$$

Where  $K_d$  is the adsorption distribution coefficient at different temperatures, and the value is computed by the ratio of the equilibrium ( $q_e$ ) to equilibrium ( $C_e$ )

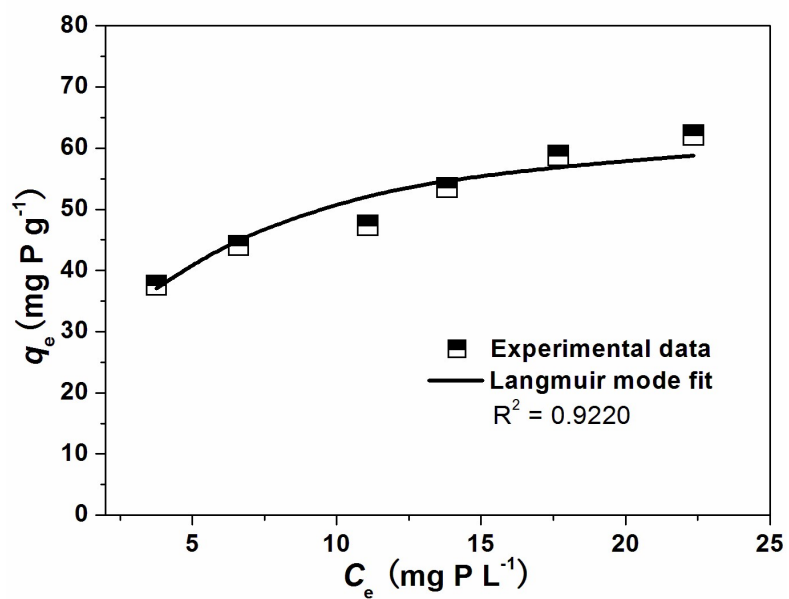

Fig. S1. Phosphate adsorption isotherm of AL-PEI-La in the ice-water bath at 273 K

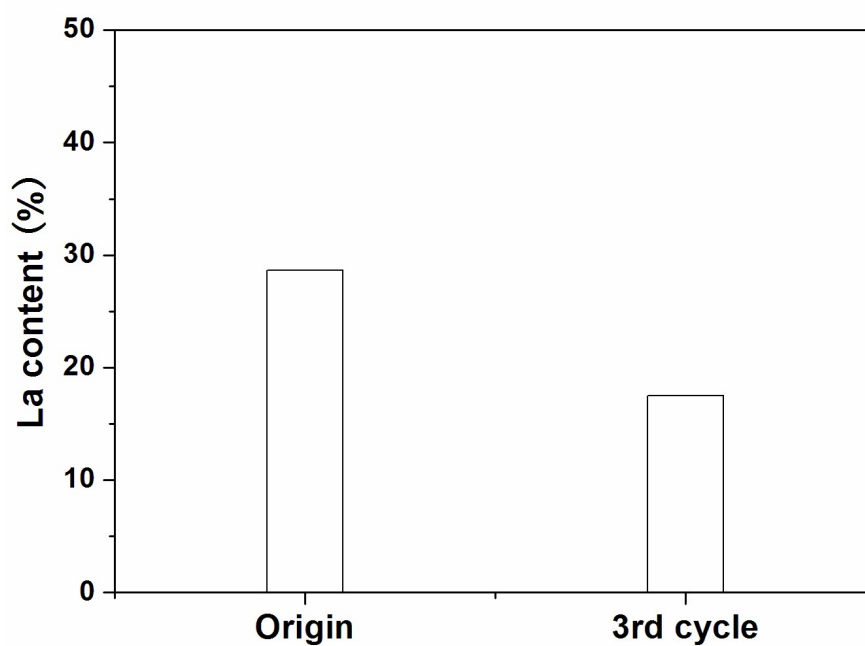

Fig. S2. The lanthanum content of AL-PEI-La origin AL-PEI-La and AL-PEI-LA after 3 cycles

**Table S1.** Adsorption kinetics fitting results for phosphate on AL-PEI-La by pseudo-first-order, pseudo-second-order, and intraparticle diffusion models.

| $C_0$<br>(mg P<br>L <sup>-1</sup> ) | $(q_{e,exp})$                                              | Pseudo-first-order<br>kinetics              |                                                     |                                                            | Pseudo-second-order<br>kinetics             |                                                     |        |
|-------------------------------------|------------------------------------------------------------|---------------------------------------------|-----------------------------------------------------|------------------------------------------------------------|---------------------------------------------|-----------------------------------------------------|--------|
|                                     |                                                            | $(q_{e,cal})$<br>(mg P<br>g <sup>-1</sup> ) | $k_1$ (g<br>mg <sup>-1</sup><br>min <sup>-1</sup> ) | $R^2$                                                      | $(q_{e,cal})$<br>(mg P<br>g <sup>-1</sup> ) | $k_2$ (g<br>mg <sup>-1</sup><br>min <sup>-1</sup> ) | $R^2$  |
| 50                                  | 37.27                                                      | 5.00                                        | 0.011                                               | 0.8830                                                     | 37.59                                       | 0.07                                                | 1.0000 |
| Intra-particle diffusion model      |                                                            |                                             |                                                     |                                                            |                                             |                                                     |        |
| $C_1$ (mg P<br>g <sup>-1</sup> )    | $k_{d1}$ (mg P<br>g <sup>-1</sup><br>min <sup>-1/2</sup> ) | $R_1^2$                                     | $C_2$ (mg P<br>g <sup>-1</sup> )                    | $k_{d2}$ (mg P<br>g <sup>-1</sup><br>min <sup>-1/2</sup> ) | $R_2^2$                                     |                                                     |        |
| 50                                  | 0                                                          | 27.43                                       | 1.000                                               | 26.29                                                      | 2.171                                       | 0.913                                               |        |

**Table S2.** Equilibrium parameters of Langmuir and Freundlich models

| Temperature<br>(K) | Langmuir<br>constans       |                                | isotherm | Freundlich<br>constans |       | isotherm |
|--------------------|----------------------------|--------------------------------|----------|------------------------|-------|----------|
|                    | b<br>(L mg <sup>-1</sup> ) | $q_m$<br>(mg g <sup>-1</sup> ) | $R^2$    | $K_f$                  | n     | $R^2$    |
| 298                | 4.47                       | 65.79                          | 0.9700   | 52.25                  | 12.74 | 0.8796   |
| 308                | 4.32                       | 74.60                          | 0.9249   | 51.46                  | 8.12  | 0.7564   |
| 318                | 0.57                       | 85.47                          | 0.9213   | 56.39                  | 9.46  | 0.8612   |

**Table S3.** Thermodynamic parameters of phosphate adsorption on AL-PEI-La at 298

K, 308 K, and 318 K, respectively.

| Temperature<br>(K) | Thermodynamic parameters             |                                      |                                                     |
|--------------------|--------------------------------------|--------------------------------------|-----------------------------------------------------|
|                    | $\Delta G^0$ (kJ mol <sup>-1</sup> ) | $\Delta H^0$ (kJ mol <sup>-1</sup> ) | $\Delta S^0$ (J mol <sup>-1</sup> K <sup>-1</sup> ) |
| 298                | -4.43                                | 21.23                                | 85.97                                               |
| 308                | -5.21                                | 21.23                                | 85.97                                               |
| 318                | -6.15                                | 21.23                                | 85.97                                               |
